# Supplementary material for: Poly(3,4-ethylenedioxythiophene)–clay nanocomposites
Source: Royal Society of Chemistry journal article supplement (doi:10.1039/b800507a), 2008-01-01
Supplement: b800507a.pdf [file b800507a.pdf]

Figures for Electronic Supplementary Information

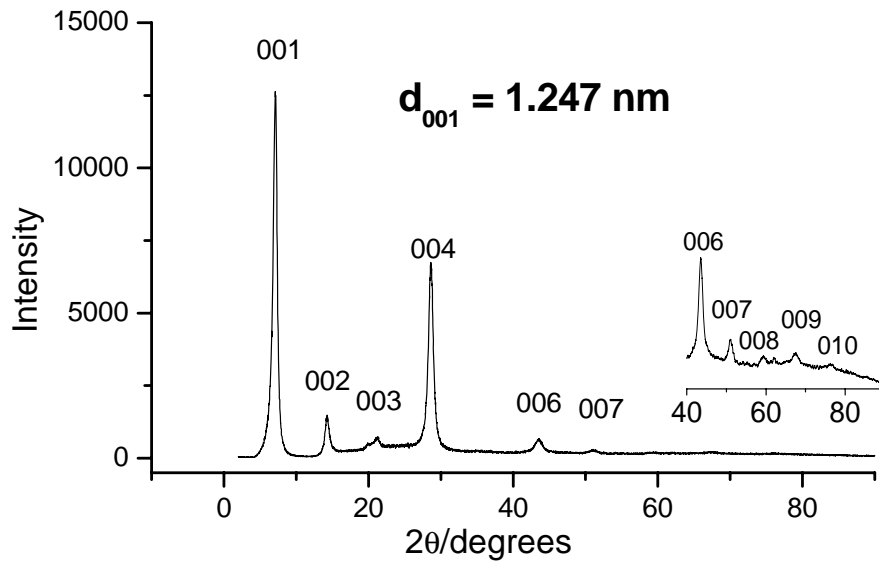

**Figure 1S.** XRD pattern of an oriented film of the ultra-fine-fraction of SWy-2 used as starting clay material.

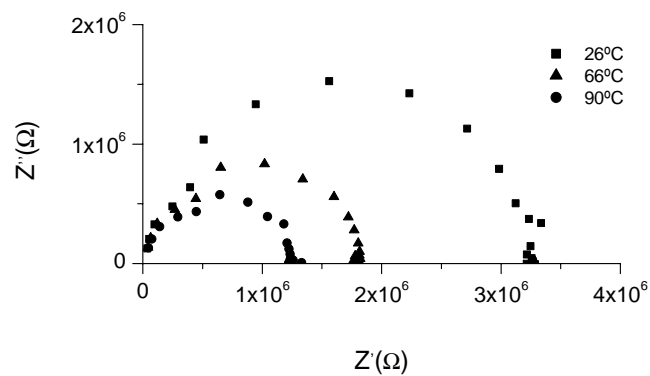

**Figure 2S.** Nyquist diagrams of a sample of PEDOT-montmorillonite nanocomposite containing around 100 mmol of PEDOT per 100g of clay. Measurements were carried out under N<sub>2</sub> flux at different temperatures (26, 66 and 90 °C).
